# Supplementary material for: Carbon nanofiber-supported ReOx catalysts for the hydrodeoxygenation of lignin-derived compounds
Source: Royal Society of Chemistry journal article supplement (doi:10.1039/c5cy01992c), 2016-01-01

## Carbon nanofiber-supported $\text{ReO}_x$ catalysts for the hydrodeoxygenation of lignin-derived compounds

I. Tyrone Ghampson,<sup>a\*</sup> Catherine Sepúlveda,<sup>a</sup> Rafael García,<sup>a</sup> José L. G. Fierro,<sup>b</sup> Néstor Escalona,<sup>c,d\*\*</sup>

<sup>a</sup>Universidad de Concepción, Facultad de Ciencias Químicas, Casilla 160c, Concepción, Chile

<sup>b</sup>Instituto de Catálisis y Petroquímica, CSIC, Cantoblanco, 28049 Madrid, Spain

<sup>c</sup>Departamento de Ingeniería Química y Bioprocesos, Escuela de Ingeniería, Pontificia Universidad Católica de Chile, Avenida Vicuña Mackenna 4860, Macul, Santiago, Chile.

<sup>d</sup>Facultad de Ciencias Químicas, Pontificia Universidad Católica de Chile.

Corresponding authors: isaactghampson@udec.cl; neescalona@ing.puc.cl

Figure S1. XPS spectra of (a) calcined and (b) spent  $\text{ReO}_x/\text{CNF}$  catalysts

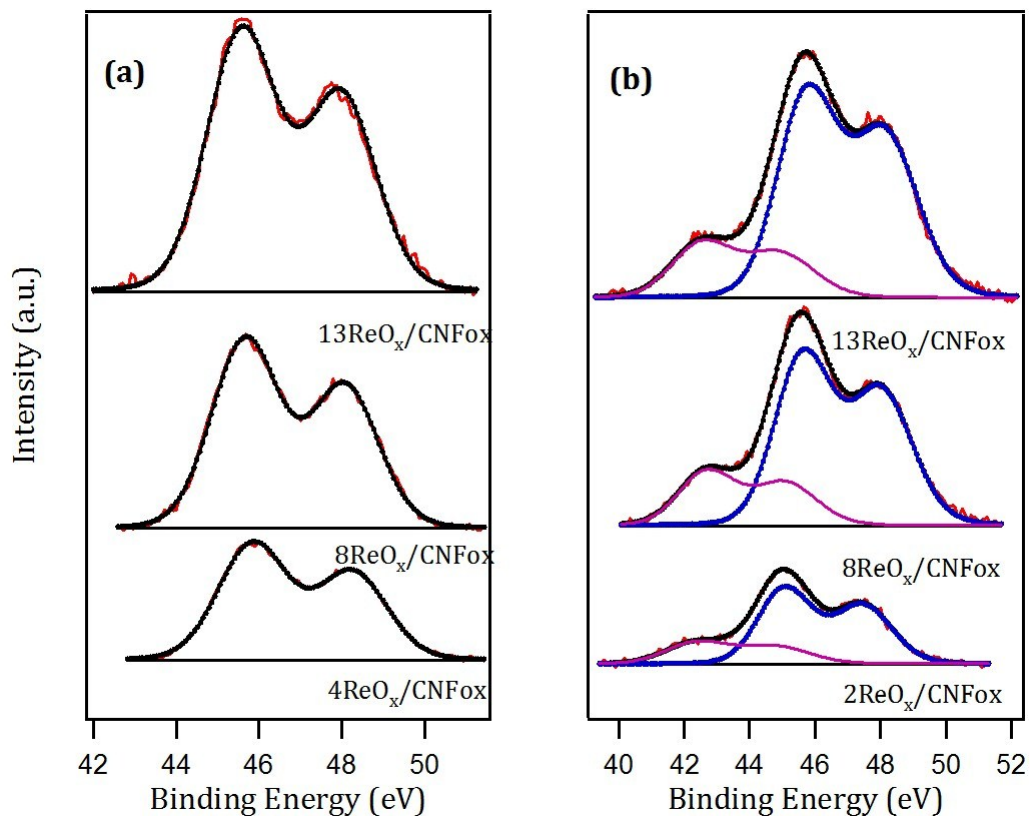

**Figure S2.** Conversion of phenol and the yield of products with time over 10ReO<sub>x</sub>/CNF catalyst as a function of H<sub>2</sub> pressure: (a) 2 MPa, (b) 3 MPa, and (c) 5 MPa. Reaction conditions: phenol (1.783 g), 10ReO<sub>x</sub>/CNF (200 mg), dodecane (80 mL), 573 K, 0-5 MPa H<sub>2</sub>.

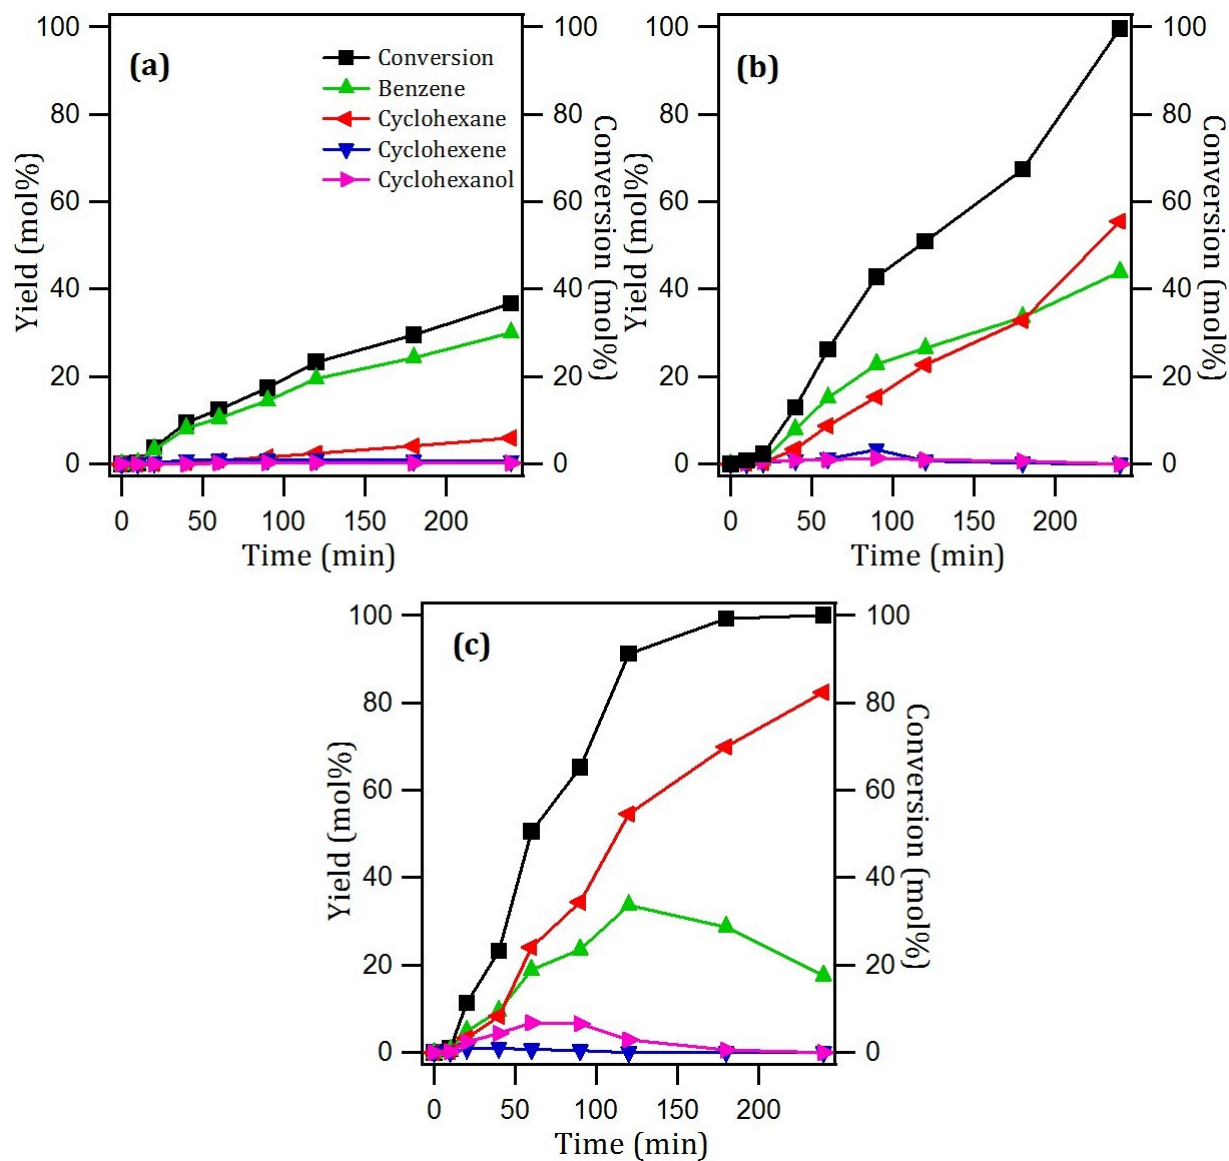

Supplement: c5cy01992c1.pdf [file c5cy01992c1.pdf]
